# Supplementary material
Source: PubMed Central journal article supplement (PMC9469687)

SUPPLEMENTARY ONLINE MATERIAL

SUPPLEMENTARY TABLE 1

| +D4-CM | +D10-CM | +C4-CM | +C6-CM | +D6-CM | +C7-CM | +pOECs | LPS control |
|--------|---------|--------|--------|--------|--------|--------|-------------|
| 102    | 74      | 81     | 83     | 113    | 127    | 79     | 123         |
| 129    | 78      | 67     | 64     | 126    | 77     | 84     | 100         |
| 92     | 107     | 74     | 69     | 131    | 80     | 95     | 88          |

SUPPLEMENTARY TABLE 2

|                                    | Medium | 50ng/ml Cryab | 100ng/ml Cryab |
|------------------------------------|--------|---------------|----------------|
| Medium                             | 50     | 52            | 43             |
|                                    | 55     | 28            | 36             |
|                                    | 44     | 43            | 51             |
| LPS                                | 53     | 50            | 47             |
|                                    | 52     | 25            | 53             |
|                                    | 56     | 40            | 54             |
| Il-1 $\alpha$ + TNF $\alpha$ + C1q | 52     | 46            | 59             |
|                                    | 41     | 29            | 65             |
|                                    | 49     | 59            | 61             |

Median values were calculated for each biological replicate obtained from multiple images containing around 100 cells for Figure 1C and 50 cells for Figure 2B.

SUPPLEMENTARY ONLINE MATERIAL

SUPPLEMENTARY TABLE 3

| Sample                     | dCt    | dCt    | dCt    | mean   | SD    | SEM   | ddCt   | 2 <sup>Δ</sup> -(ddCt) | 2 <sup>Δ</sup> -(ddCt-SEM) | 2 <sup>Δ</sup> -(ddCt+SEM) |
|----------------------------|--------|--------|--------|--------|-------|-------|--------|------------------------|----------------------------|----------------------------|
| <b>LPS</b>                 |        |        |        |        |       |       |        |                        |                            |                            |
| Fkbp5                      | 7.831  | 7.461  | 8.015  | 7.769  | 0.282 | 0.163 | 0.000  | 1.000                  | 1.120                      | 0.893                      |
| Ggta1                      | 6.781  | 6.949  | 7.044  | 6.925  | 0.134 | 0.077 | 0.000  | 1.000                  | 1.055                      | 0.948                      |
| Serping1                   | 4.895  | 4.539  | 4.655  | 4.697  | 0.181 | 0.105 | 0.000  | 1.000                  | 1.075                      | 0.930                      |
| Ligp1                      | 7.240  | 7.012  | 7.063  | 7.105  | 0.120 | 0.069 | 0.000  | 1.000                  | 1.049                      | 0.953                      |
| Gbp2                       | 1.580  | 1.415  | 1.755  | 1.583  | 0.170 | 0.098 | 0.000  | 1.000                  | 1.070                      | 0.934                      |
| Amigo2                     | 9.793  | 9.748  | 9.844  | 9.795  | 0.048 | 0.028 | 0.000  | 1.000                  | 1.019                      | 0.981                      |
| H2-T23                     | 3.418  | 3.566  | 3.830  | 3.605  | 0.209 | 0.120 | 0.000  | 1.000                  | 1.087                      | 0.920                      |
| Srgn                       | 5.651  | 5.635  | 5.730  | 5.672  | 0.051 | 0.030 | 0.000  | 1.000                  | 1.021                      | 0.980                      |
| H2D1                       | -4.439 | -4.486 | -4.382 | -4.436 | 0.052 | 0.030 | 0.000  | 1.000                  | 1.021                      | 0.979                      |
| Ugt1a1                     | 7.087  | 7.195  | 7.317  | 7.200  | 0.115 | 0.066 | 0.000  | 1.000                  | 1.047                      | 0.955                      |
| C3                         | 6.603  | 6.681  | 7.080  | 6.788  | 0.256 | 0.148 | 0.000  | 1.000                  | 1.108                      | 0.903                      |
| Fbln5                      | 11.742 | 11.483 | 11.806 | 11.677 | 0.171 | 0.099 | 0.000  | 1.000                  | 1.071                      | 0.934                      |
| <b>LPS +OEC-CM</b>         |        |        |        |        |       |       |        |                        |                            |                            |
| Fkbp5                      | 9.217  | 9.269  | 9.114  | 9.200  | 0.079 | 0.046 | 1.431  | 0.371                  | 0.383                      | 0.359                      |
| Ggta1                      | 8.041  | 8.182  | 9.227  | 8.484  | 0.648 | 0.374 | 1.559  | 0.339                  | 0.440                      | 0.262                      |
| Serping1                   | 5.899  | 5.969  | 5.964  | 5.944  | 0.039 | 0.022 | 1.248  | 0.421                  | 0.428                      | 0.415                      |
| Ligp1                      | 8.242  | 8.474  | 8.401  | 8.372  | 0.119 | 0.069 | 1.267  | 0.416                  | 0.436                      | 0.396                      |
| Gbp2                       | 3.030  | 3.230  | 4.131  | 3.463  | 0.587 | 0.339 | 1.880  | 0.272                  | 0.344                      | 0.215                      |
| Amigo2                     | 11.367 | 11.378 | 14.133 | 12.293 | 1.594 | 0.920 | 2.498  | 0.177                  | 0.335                      | 0.094                      |
| H2-T23                     | 4.164  | 4.506  | 4.531  | 4.400  | 0.205 | 0.119 | 0.796  | 0.576                  | 0.625                      | 0.531                      |
| Srgn                       | 7.426  | 7.711  | 7.011  | 7.383  | 0.352 | 0.203 | 1.711  | 0.306                  | 0.352                      | 0.265                      |
| H2D1                       | -3.297 | -3.152 | -2.696 | -3.048 | 0.314 | 0.181 | 1.387  | 0.382                  | 0.433                      | 0.337                      |
| Ugt1a1                     | 8.151  | 9.198  | 9.449  | 8.932  | 0.688 | 0.397 | 1.733  | 0.301                  | 0.396                      | 0.228                      |
| C3                         | 8.288  | 7.970  | 7.645  | 7.968  | 0.322 | 0.186 | 1.179  | 0.442                  | 0.502                      | 0.388                      |
| Fbln5                      | 13.173 | 12.940 | 12.920 | 13.011 | 0.141 | 0.081 | 1.334  | 0.397                  | 0.420                      | 0.375                      |
| <b>LPS +CryABKO OEC-CM</b> |        |        |        |        |       |       |        |                        |                            |                            |
| Fkbp5                      | 7.034  | 7.021  | 7.562  | 7.205  | 0.309 | 0.178 | -0.563 | 1.478                  | 1.672                      | 1.306                      |
| Ggta1                      | 4.680  | 4.735  | 4.673  | 4.696  | 0.034 | 0.020 | -2.229 | 4.687                  | 4.752                      | 4.623                      |
| Serping1                   | 2.442  | 2.555  | 2.483  | 2.493  | 0.057 | 0.033 | -2.203 | 4.605                  | 4.711                      | 4.501                      |
| Ligp1                      | 5.831  | 6.017  | 5.579  | 5.809  | 0.220 | 0.127 | -1.296 | 2.455                  | 2.681                      | 2.248                      |
| Gbp2                       | 0.146  | 1.509  | 0.293  | 0.650  | 0.748 | 0.432 | -0.933 | 1.910                  | 2.576                      | 1.416                      |
| Amigo2                     | 9.983  | 9.845  | 9.550  | 9.793  | 0.221 | 0.128 | -0.002 | 1.002                  | 1.094                      | 0.917                      |
| H2-T23                     | 7.413  | 5.966  | 5.216  | 6.198  | 1.117 | 0.645 | 2.594  | 0.166                  | 0.259                      | 0.106                      |
| Srgn                       | 6.305  | 7.722  | 8.020  | 7.349  | 0.916 | 0.529 | 1.677  | 0.313                  | 0.451                      | 0.217                      |
| H2D1                       | -3.402 | -3.416 | -3.233 | -3.351 | 0.102 | 0.059 | 1.085  | 0.471                  | 0.491                      | 0.452                      |
| Ugt1a1                     | 7.791  | 8.941  | 8.113  | 8.282  | 0.593 | 0.342 | 1.082  | 0.472                  | 0.599                      | 0.373                      |
| C3                         | 8.070  | 7.776  | 9.057  | 8.301  | 0.671 | 0.387 | 1.513  | 0.350                  | 0.458                      | 0.268                      |
| Fbln5                      | 11.586 | 12.106 | 12.276 | 11.989 | 0.359 | 0.207 | 0.313  | 0.805                  | 0.930                      | 0.697                      |
| <b>LPS +IP-CryAB</b>       |        |        |        |        |       |       |        |                        |                            |                            |
| Fkbp5                      | 7.057  | 7.839  | 7.602  | 7.499  | 0.401 | 0.232 | -0.269 | 1.205                  | 1.415                      | 1.026                      |
| Ggta1                      | 7.713  | 7.937  | 7.758  | 7.803  | 0.119 | 0.069 | 0.878  | 0.544                  | 0.571                      | 0.519                      |
| Serping1                   | 5.114  | 5.172  | 5.249  | 5.178  | 0.068 | 0.039 | 0.482  | 0.716                  | 0.736                      | 0.697                      |
| Ligp1                      | 8.687  | 8.955  | 8.787  | 8.810  | 0.135 | 0.078 | 1.704  | 0.307                  | 0.324                      | 0.291                      |
| Gbp2                       | 3.079  | 3.347  | 3.246  | 3.224  | 0.135 | 0.078 | 1.641  | 0.321                  | 0.338                      | 0.304                      |
| Amigo2                     | 10.597 | 11.388 | 12.252 | 11.412 | 0.828 | 0.478 | 1.617  | 0.326                  | 0.454                      | 0.234                      |
| H2-T23                     | 4.391  | 5.143  | 4.150  | 4.561  | 0.518 | 0.299 | 0.957  | 0.515                  | 0.634                      | 0.419                      |
| Srgn                       | 6.580  | 6.512  | 6.626  | 6.573  | 0.057 | 0.033 | 0.901  | 0.536                  | 0.548                      | 0.524                      |
| H2D1                       | -3.032 | -3.279 | -3.256 | -3.189 | 0.136 | 0.079 | 1.247  | 0.421                  | 0.445                      | 0.399                      |
| Ugt1a1                     | 8.277  | 6.647  | 7.045  | 7.323  | 0.850 | 0.490 | 0.123  | 0.918                  | 1.290                      | 0.654                      |
| C3                         | 6.097  | 6.949  | 6.158  | 6.401  | 0.476 | 0.275 | -0.387 | 1.308                  | 1.582                      | 1.081                      |
| Fbln5                      | 10.750 | 10.186 | 10.053 | 10.329 | 0.370 | 0.214 | -1.347 | 2.544                  | 2.950                      | 2.194                      |

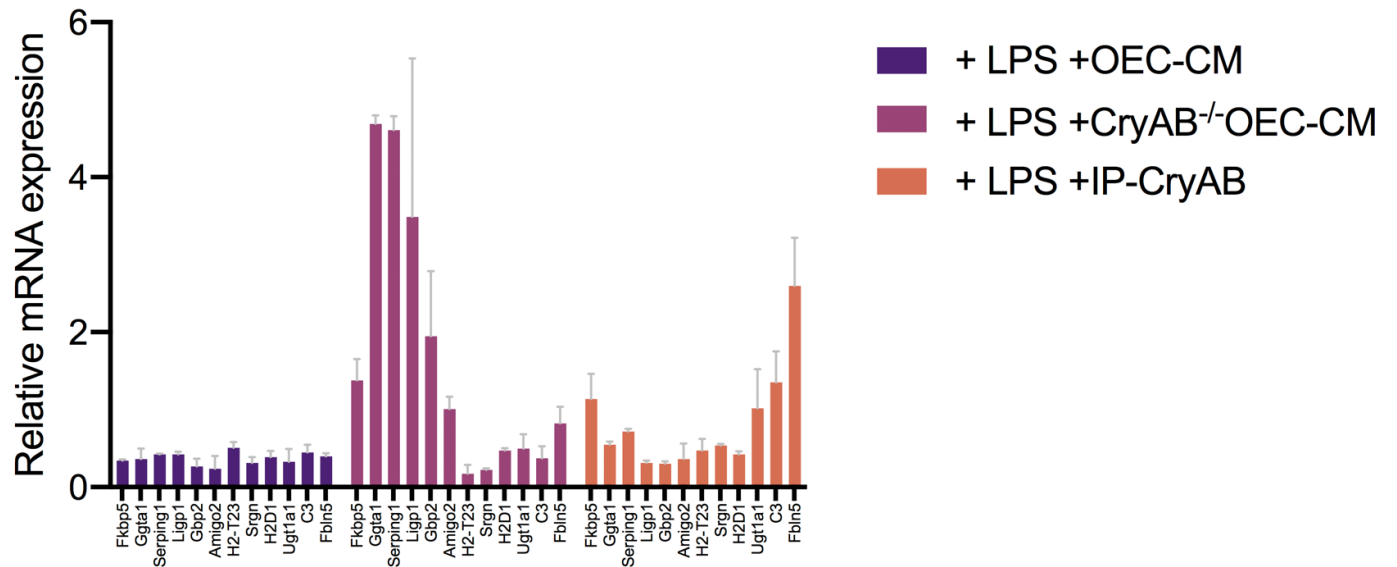

Supplement: NIHMS1704299-supplement-sup_tables_1-3.pdf [file NIHMS1704299-supplement-sup_tables_1-3.pdf]
